# Supplementary material for: Single and Especially Multisport Participation May Increase Physical Fitness in Younger Americans
Source: MDPI journal article supplement (doi:10.3390/sports10120202), 2022-12-09
Supplement: s1 [file s1]

## Supplementary Materials

**Table S1.** Means and 95% Confidence Intervals for the Descriptive Characteristics by Sport Participation Status.

| Variable                                           | Participates in Sports | No Sports Participation |
|----------------------------------------------------|------------------------|-------------------------|
| Age (years)                                        | 10.7 (10.4, 10.9)      | 10.1 (9.9, 10.4)        |
| Aged 12-15 Years                                   | 41.3 (37.0, 45.6)      | 39.1 (35.2, 43.0)       |
| Female (n (%))                                     | 47.0 (42.7, 51.3)      | 52.8 (48.8, 56.8)       |
| Obese (n (%))                                      | 19.2 (15.8, 22.7)      | 20.8 (17.5, 24.0)       |
| White Race (n (%))                                 | 42.5 (38.2, 46.8)      | 38.6 (34.7, 42.5)       |
| Income-to-Poverty Ratio                            | 2.4 (2.2, 2.5)         | 2.2 (2.0, 2.3)          |
| Below Poverty Threshold (n (%))                    | 24.6 (20.8, 28.3)      | 33.1 (29.4, 36.9)       |
| Meeting Youth Physical Activity Guidelines (n (%)) | 46.6 (42.3, 50.9)      | 45.3 (41.3, 49.3)       |
| Handgrip Strength (kilograms)                      | 23.4 (22.5, 24.6)      | 21.4 (20.6, 22.2)       |
| Leg Extension Strength (kilograms)                 | 66.7 (63.7, 69.6)      | 59.6 (57.0, 62.2)       |
| Plank Position Held (seconds)                      | 75.1 (71.0, 79.1)      | 63.8 (60.3, 67.2)       |
| Graded Exercise Test Endurance Time (seconds)      | 655.4 (639.3, 671.5)   | 646.6 (632.5, 660.7)    |
| Estimated Maximal Oxygen Uptake (ml/kg/min)        | 43.0 (41.6, 44.4)      | 39.8 (38.5, 41.0)       |

**Table S2.** Medians and Interquartile Ranges for the Continuous Characteristics by Sport Participation Status.

| Variable                                      | Participates in Sports | No Sports Participation |
|-----------------------------------------------|------------------------|-------------------------|
| Age (years)                                   | 11.0 (8.0, 13.0)       | 10.0 (7.0, 13.0)        |
| Income-to-Poverty Ratio                       | 2.0 (1.0, 3.8)         | 1.7 (0.7, 3.5)          |
| Handgrip Strength (kilograms)                 | 22.1 (15.7, 29.6)      | 19.6 (13.8, 26.9)       |
| Leg Extension Strength (kilograms)            | 61.3 (40.8, 87.4)      | 51.8 (34.9, 79.3)       |
| Plank Position Held (seconds)                 | 67.0 (42.0, 97.5)      | 60.0 (33.0, 84.0)       |
| Graded Exercise Test Endurance Time (seconds) | 657.0 (570.0, 737.0)   | 662.0 (556.0, 741.0)    |
| Estimated Maximal Oxygen Uptake (ml/kg/min)   | 40.9 (35.9, 48.6)      | 37.8 (33.4, 44.3)       |

**Table S3.** Means and 95% Confidence Intervals for the Characteristics by Multisport Participation Status.

| Variable                                           | No Sports Participation | Single Sport Participation | Multisport Participation |
|----------------------------------------------------|-------------------------|----------------------------|--------------------------|
|                                                    |                         | 10.7 (10.4, 11.0)          | 10.6 (10.3, 10.9)        |
|                                                    |                         | 42.5 (36.7, 48.2)          | 39.8 (33.3, 46.2)        |
|                                                    |                         | 49.1 (43.3, 54.9)          | 44.3 (37.7, 50.8)        |
| Age (years)                                        | 10.1 (9.9, 10.4)        | 20.5 (15.8, 25.2)          | 17.6 (12.6, 22.6)        |
| Aged 12-15 Years                                   | 39.1 (35.2, 43.0)       | 52.8 (48.8, 56.8)          | 41.6 (35.1, 48.1)        |
| Female (n (%))                                     | 20.8 (17.5, 24.0)       | 38.6 (34.7, 42.5)          | 2.4 (2.2, 2.6)           |
| Obese (n (%))                                      | 33.1 (29.4, 36.9)       | 24.7 (19.7, 29.7)          | 24.4 (18.7, 30.1)        |
| White Race (n (%))                                 | 45.3 (41.3, 49.3)       | 45.3 (39.5, 51.0)          | 48.2 (41.8, 55.0)        |
| Income-to-Poverty Ratio                            | 21.4 (20.6, 22.2)       | 59.6 (57.0, 62.2)          | 23.4 (22.3, 24.6)        |
| Below Poverty Threshold (n (%))                    | 63.8 (60.3, 67.2)       | 66.2 (62.1, 70.3)          | 67.2 (63.1, 71.4)        |
| Meeting Youth Physical Activity Guidelines (n (%)) | 646.6 (632.5, 660.7)    | 39.8 (38.5, 41.0)          | 71.3 (66.3, 76.4)        |
| Handgrip Strength (kilograms)                      |                         | 651.2 (630.8, 671.7)       | 660.4 (634.6, 686.1)     |
| Leg Extension Strength (kilograms)                 |                         | 42.1 (40.3, 44.0)          | 44.2 (41.9, 46.4)        |
| Plank Position Held (seconds)                      |                         |                            |                          |
| Graded Exercise Test Endurance Time (seconds)      |                         |                            |                          |
| Estimated Maximal Oxygen Uptake (ml/kg/min)        |                         |                            |                          |

**Table S4.** Medians and Interquartile Ranges for the Continuous Characteristics by Sport Participation Status.

| Variable                                      | No Sports Participation | Single Sport Participation | Multisport Participation |
|-----------------------------------------------|-------------------------|----------------------------|--------------------------|
| Age (years)                                   | 10.0 (7.0, 13.0)        | 11.0 (8.0, 13.0)           | 11.0 (8.0, 13.0)         |
| Income-to-Poverty Ratio                       | 1.7 (0.7, 3.5)          | 1.9 (1.0, 3.7)             | 2.1 (1.0, 3.9)           |
| Handgrip Strength (kilograms)                 | 19.6 (13.8, 26.9)       | 22.3 (15.4, 30.3)          | 21.8 (16.4, 28.9)        |
| Leg Extension Strength (kilograms)            | 51.8 (34.9, 79.5)       | 60.3 (39.1, 87.6)          | 61.8 (44.5, 87.3)        |
| Plank Position Held (seconds)                 | 60.0 (33.0, 84.0)       | 65.0 (41.0, 95.0)          | 69.0 (45.0, 101.0)       |
| Graded Exercise Test Endurance Time (seconds) | 662.0 (556.0, 741.0)    | 656.0 (559.0, 733.0)       | 659.0 (577.5, 756.0)     |
| Estimated Maximal Oxygen Uptake (ml/kg/min)   | 37.8 (33.4, 44.3)       | 39.2 (35.6, 46.9)          | 42.9 (37.1, 50.0)        |

**Table S5.** Associations Between Any Sports Participation Status and Log Transformed Markers of Physical Fitness.

| Variable                        | Participates in Sport |                         |         |
|---------------------------------|-----------------------|-------------------------|---------|
|                                 | $\beta$               | 95% Confidence Interval | P-value |
| Handgrip Strength               | 0.08                  | 0.05, 0.11              | <0.001  |
| Leg Extension Strength          | 0.11                  | 0.06, 0.16              | <0.001  |
| Plank Position Held             | 0.16                  | 0.07, 0.25              | <0.001  |
| Graded Exercise Test Endurance  | 0.01                  | -0.03, 0.04             | 0.78    |
| Estimated Maximal Oxygen Uptake | 0.07                  | 0.03, 0.11              | <0.001  |

**Table S6.** Associations Between Multisport Participation Status and Log Transformed Markers of Physical Fitness.

| Variable                        | Single Sport Participation |             |         | Multisport Participation |             |         |
|---------------------------------|----------------------------|-------------|---------|--------------------------|-------------|---------|
|                                 | $\beta$                    | 95% CI      | P-value | $\beta$                  | 95% CI      | P-value |
| Handgrip Strength               | 0.07                       | 0.03, 0.10  | <0.001  | 0.09                     | 0.05, 0.14  | <0.001  |
| Leg Extension Strength          | 0.08                       | 0.01, 0.14  | 0.01    | 0.15                     | 0.08, 0.22  | <0.001  |
| Plank Position Held             | 0.11                       | 0.01, 0.21  | 0.02    | 0.23                     | 0.11, 0.34  | <0.001  |
| Graded Exercise Test Endurance  | 0.01                       | -0.03, 0.06 | 0.60    | -0.01                    | -0.05, 0.05 | 0.90    |
| Estimated Maximal Oxygen Uptake | 0.06                       | 0.01, 0.11  | 0.005   | 0.08                     | 0.03, 0.13  | 0.001   |

**Table S7.** Associations Between Any Sports Participation Status and Markers of Physical Fitness by Gender.

| Variable                        | Participates in Sport |                         |         |
|---------------------------------|-----------------------|-------------------------|---------|
|                                 | $\beta$               | 95% Confidence Interval | P-value |
| <i>Males</i>                    |                       |                         |         |
| Handgrip Strength               | 1.90                  | 0.77, 3.04              | 0.001   |
| Leg Extension Strength          | 7.31                  | 2.54, 12.08             | 0.002   |
| Plank Position Held             | 11.58                 | 4.17, 18.98             | 0.002   |
| Graded Exercise Test Endurance  | 19.04                 | -11.39, 49.48           | 0.21    |
| Estimated Maximal Oxygen Uptake | 4.44                  | 1.93, 6.96              | <0.001  |
| <i>Females</i>                  |                       |                         |         |
| Handgrip Strength               | 1.42                  | 0.61, 2.23              | <0.001  |
| Leg Extension Strength          | 5.36                  | 1.49, 9.23              | 0.006   |
| Plank Position Held             | 7.50                  | 1.12, 13.88             | 0.02    |
| Graded Exercise Test Endurance  | -7.26                 | -31.73, 17.20           | 0.55    |
| Estimated Maximal Oxygen Uptake | 1.49                  | -1.06, 4.05             | 0.25    |

**Table S8.** Associations Between Multisport Participation Status and Markers of Physical Fitness by Gender.

| Variable                        | Single Sport Participation |               |         | Multisport Participation |               |         |
|---------------------------------|----------------------------|---------------|---------|--------------------------|---------------|---------|
|                                 | $\beta$                    | 95% CI        | P-value | $\beta$                  | 95% CI        | P-value |
| <i>Males</i>                    |                            |               |         |                          |               |         |
| Handgrip Strength               | 1.84                       | 0.48, 3.20    | 0.007   | 1.98                     | 0.53, 3.42    | 0.007   |
| Leg Extension Strength          | 6.69                       | 0.99, 12.40   | 0.02    | 8.05                     | 1.99, 14.12   | 0.009   |
| Plank Position Held             | 6.78                       | -2.03, 15.61  | 0.13    | 17.33                    | 7.94, 26.71   | <0.001  |
| Graded Exercise Test Endurance  | 15.50                      | -20.99, 52.01 | 0.40    | 23.25                    | -15.47, 61.98 | 0.23    |
| Estimated Maximal Oxygen Uptake | 3.59                       | 0.52, 6.65    | 0.02    | 5.32                     | 2.24, 8.40    | <0.001  |
| <i>Females</i>                  |                            |               |         |                          |               |         |
| Handgrip Strength               | 1.50                       | 0.54, 2.47    | 0.002   | 1.30                     | 0.21, 2.39    | 0.01    |
| Leg Extension Strength          | 4.35                       | -0.22, 8.94   | 0.06    | 6.78                     | 1.58, 11.97   | 0.01    |
| Plank Position Held             | 6.12                       | -1.44, 13.69  | 0.11    | 9.43                     | 0.86, 18.01   | 0.03    |
| Graded Exercise Test Endurance  | -5.85                      | -36.07, 24.37 | 0.70    | -8.89                    | -40.81, 23.01 | 0.58    |
| Estimated Maximal Oxygen Uptake | 1.75                       | -1.14, 4.64   | 0.23    | 0.98                     | -2.72, 4.70   | 0.60    |
